# Supplementary material
Source: publisher figshare collection journal article supplement (https://tandf.figshare.com/ndownloader/files/15603098)
Supplement: Supplementary file 1 [file 15603098]

**Beautiful pictures of Antarctica**

---- taken by the 29th CHINARE (2012.10—2013.04)

Antarctic inland Kunlun Station expedition members


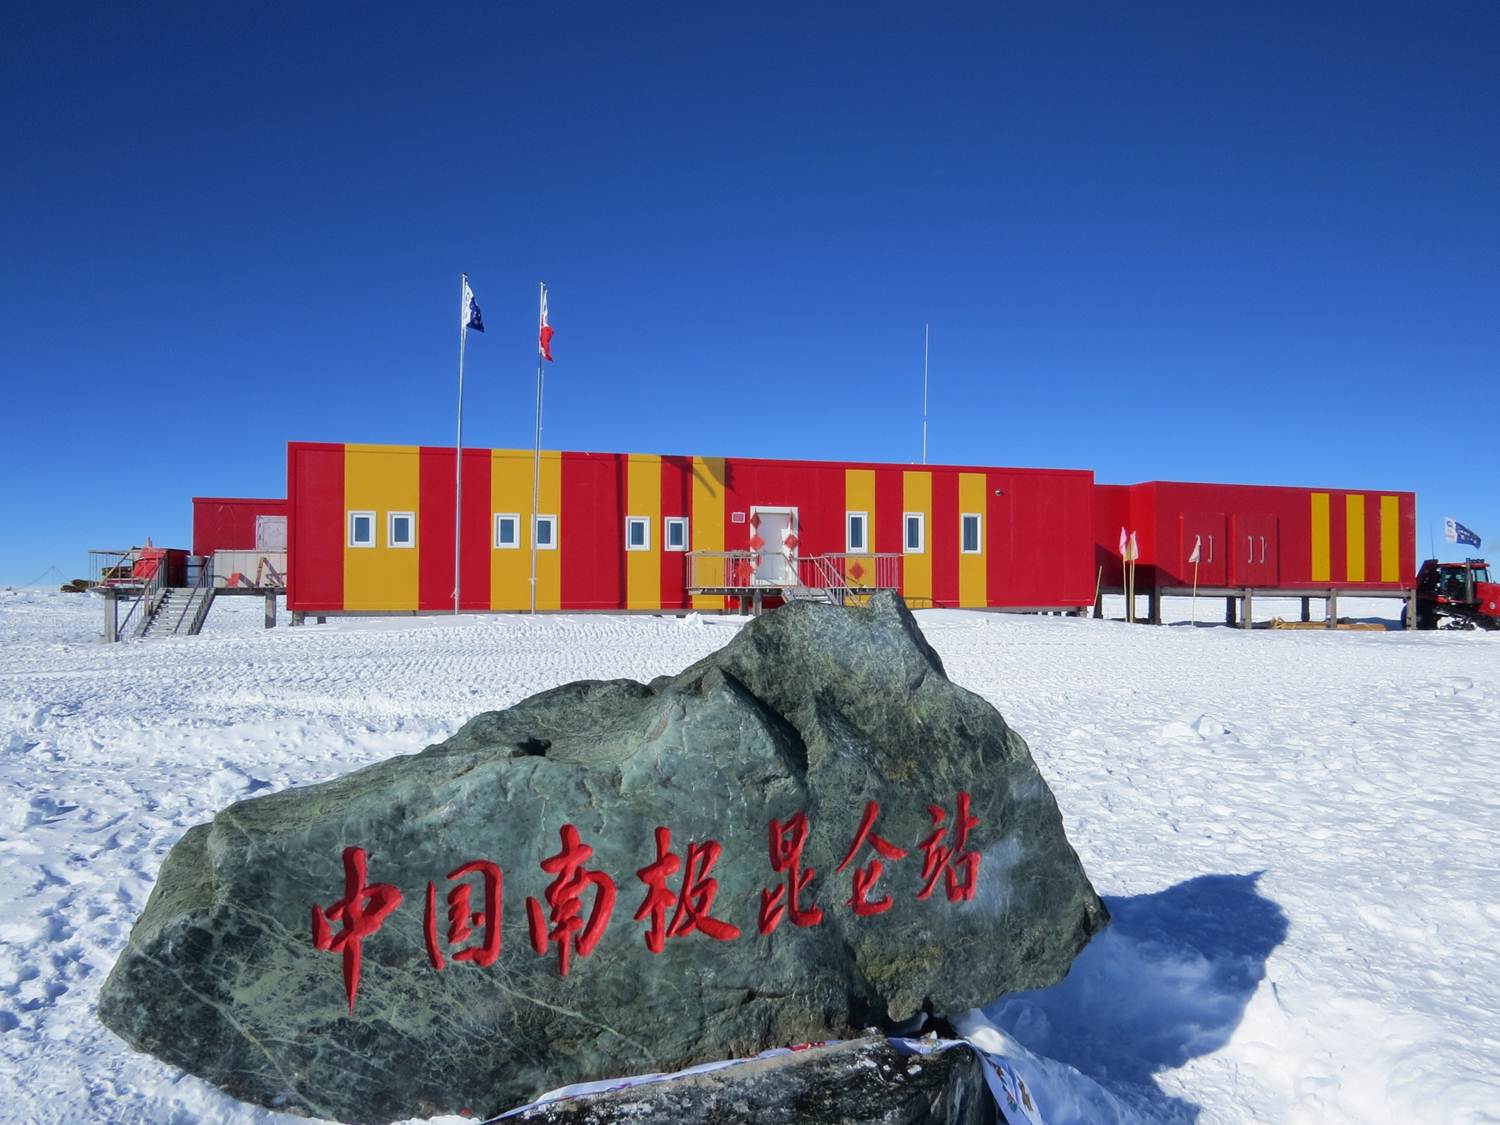


Fig.1 Antarctic inland Kunlun Station


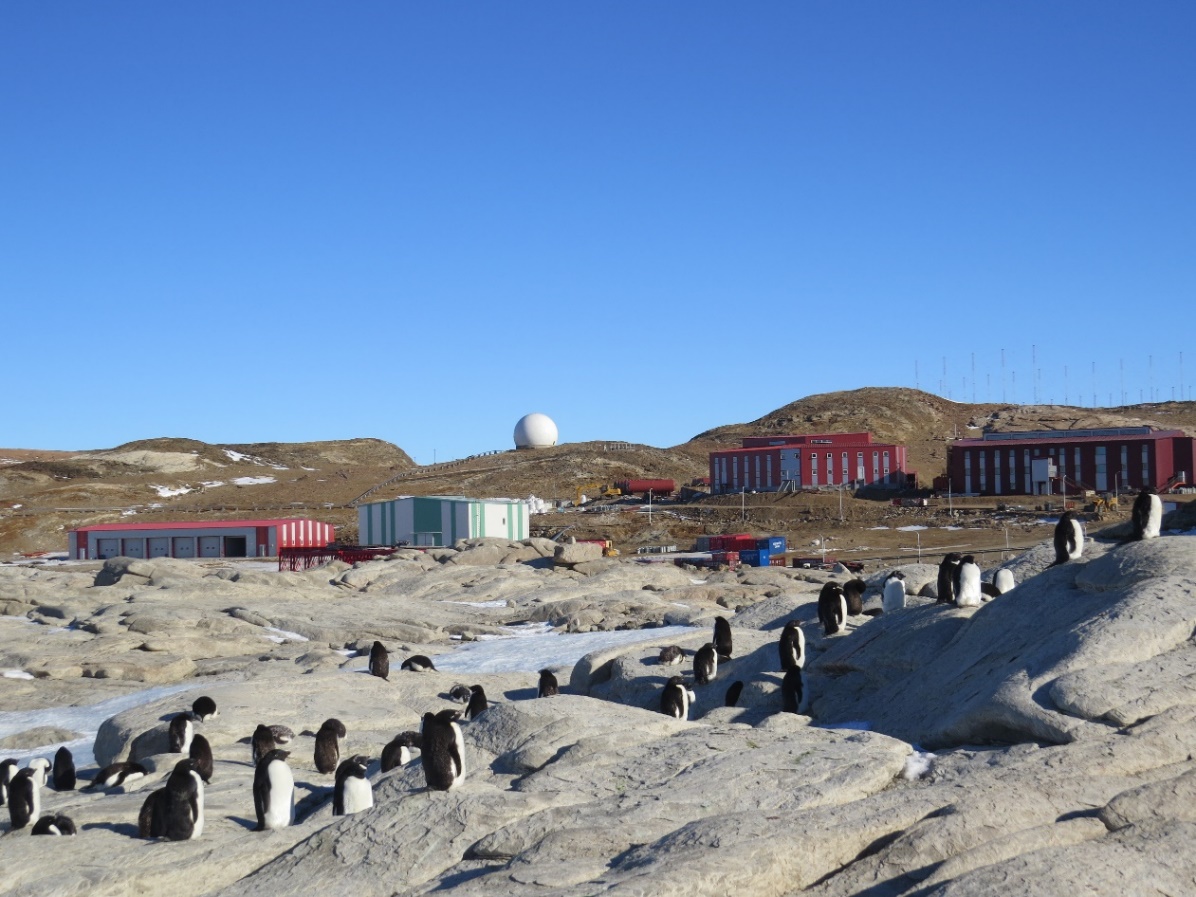


Fig.2 Antarctic penguins near Zhongshan Station


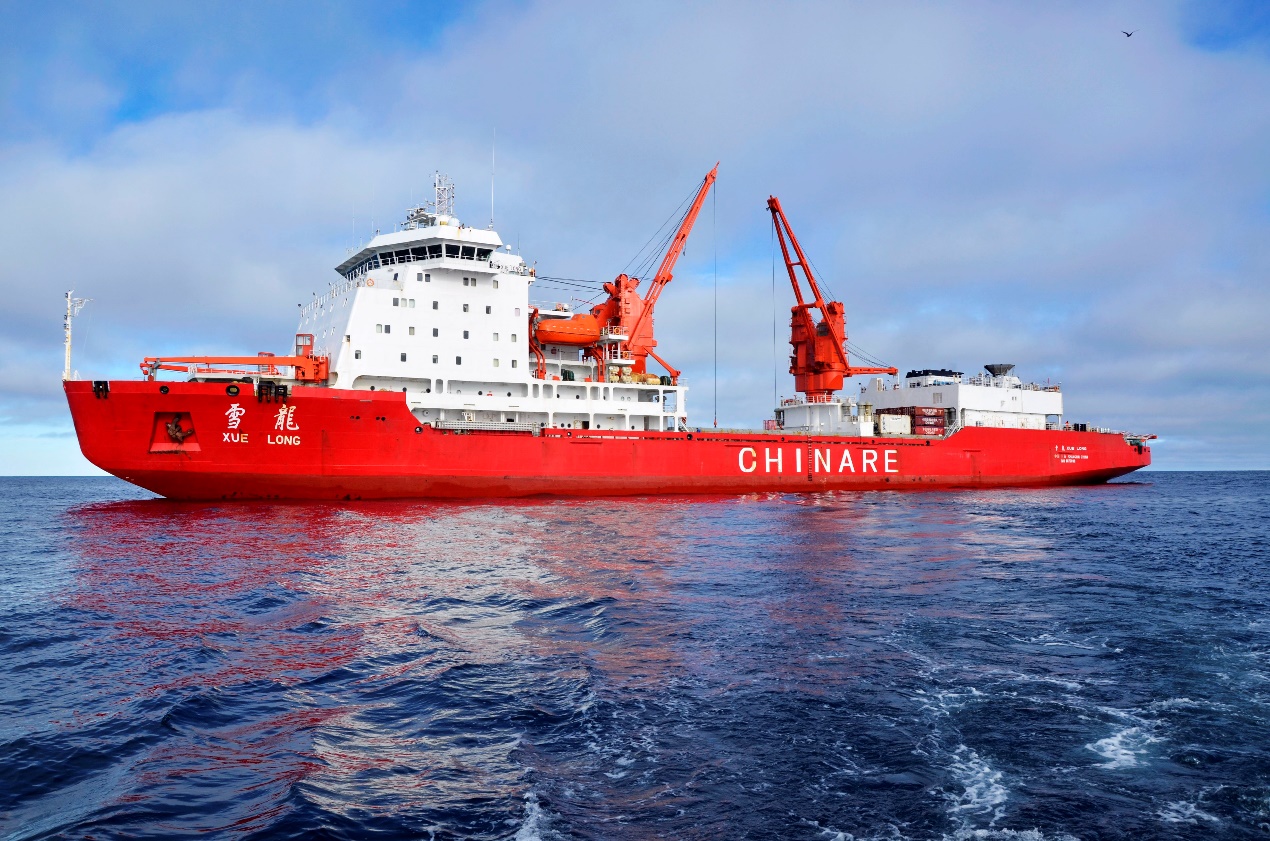


Fig.3 Xuelong research vessel on the sea


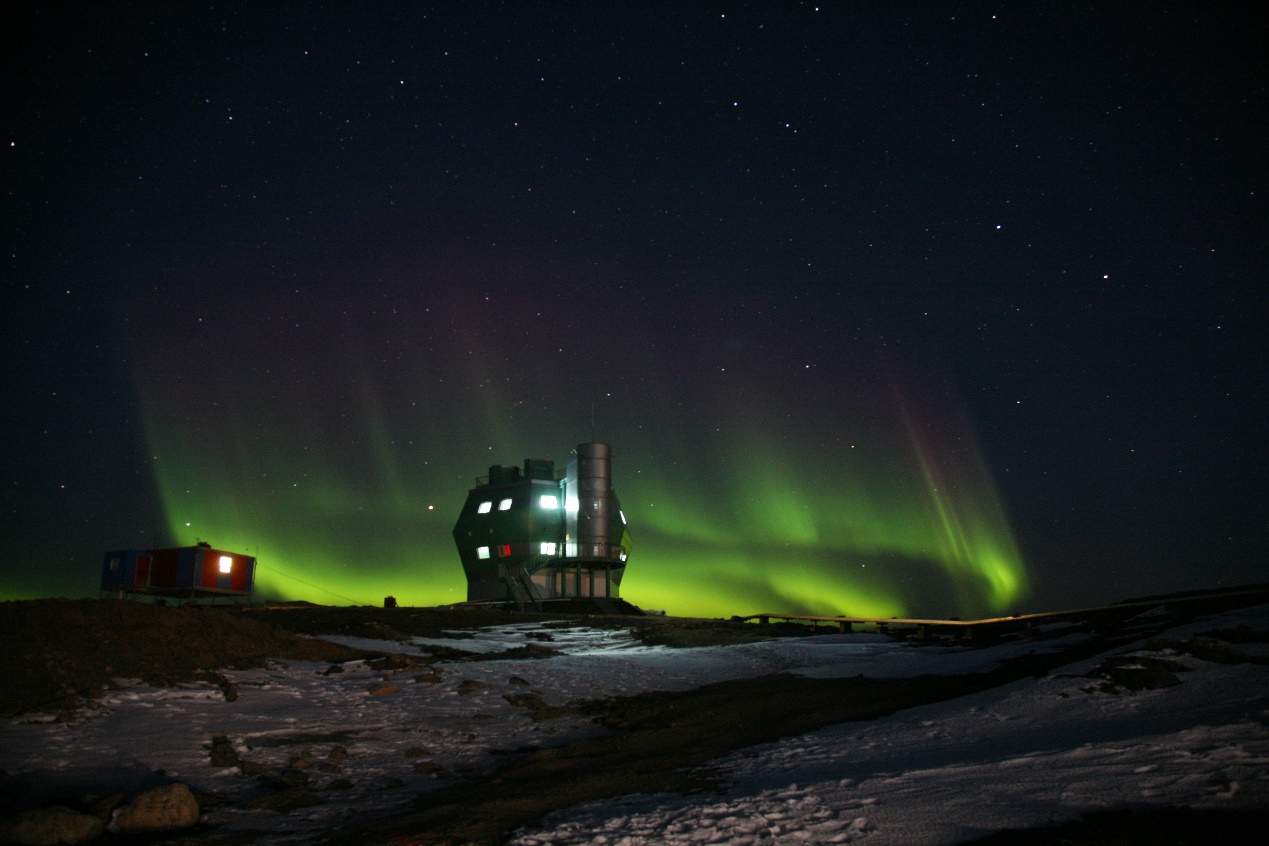


Fig.4 Antarctic aurora at Zhongshan Station


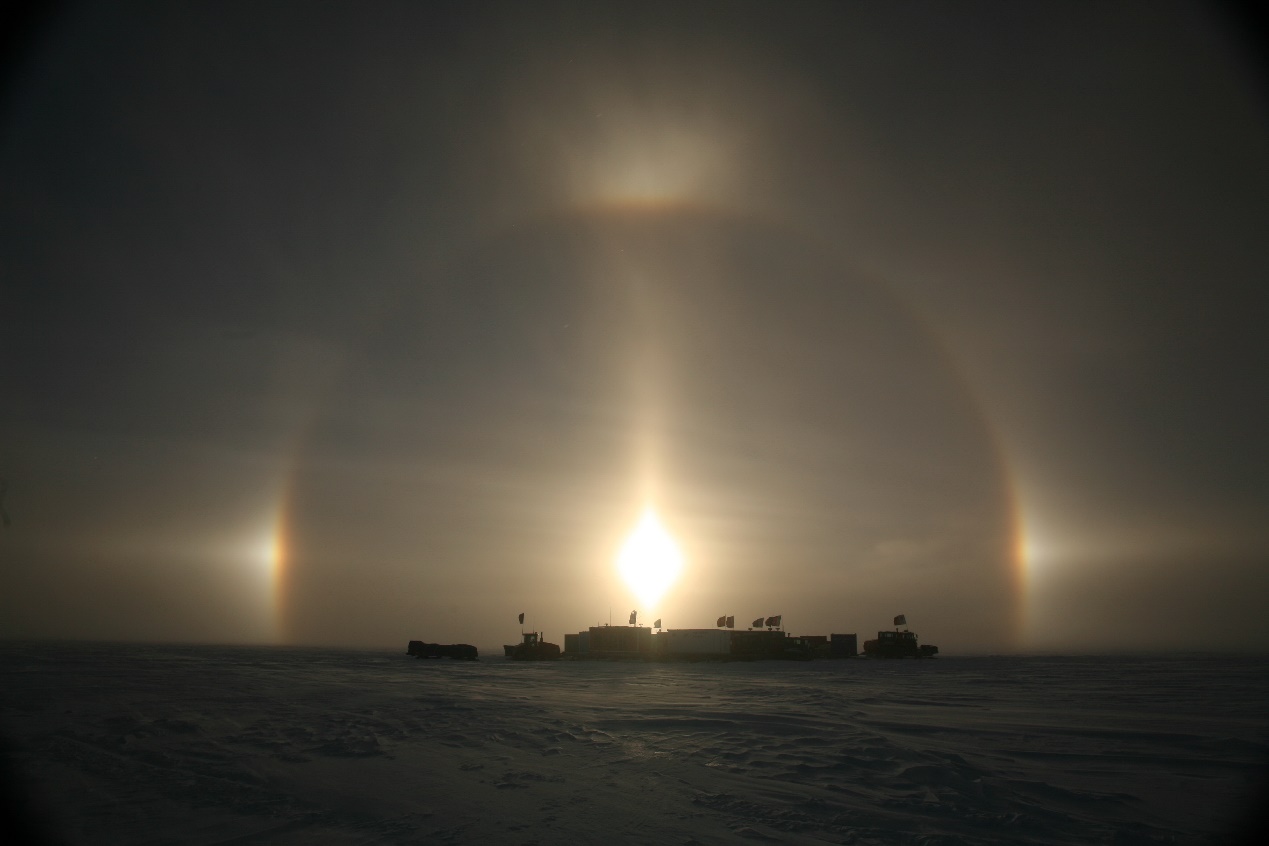


Fig.5 Antarctic inland solar halo


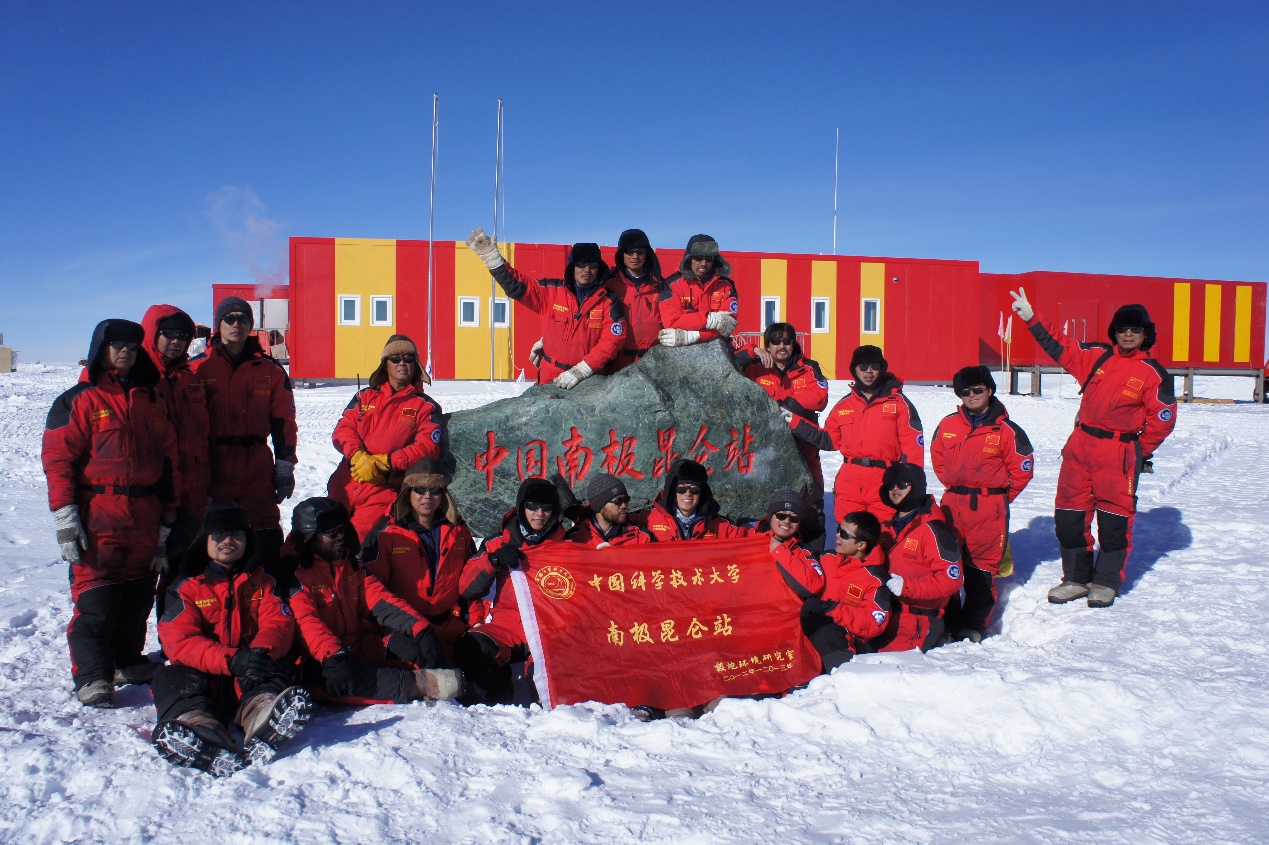


Fig.6 The flag of University of Science and Technology of China at Antarctic Kunlun Station


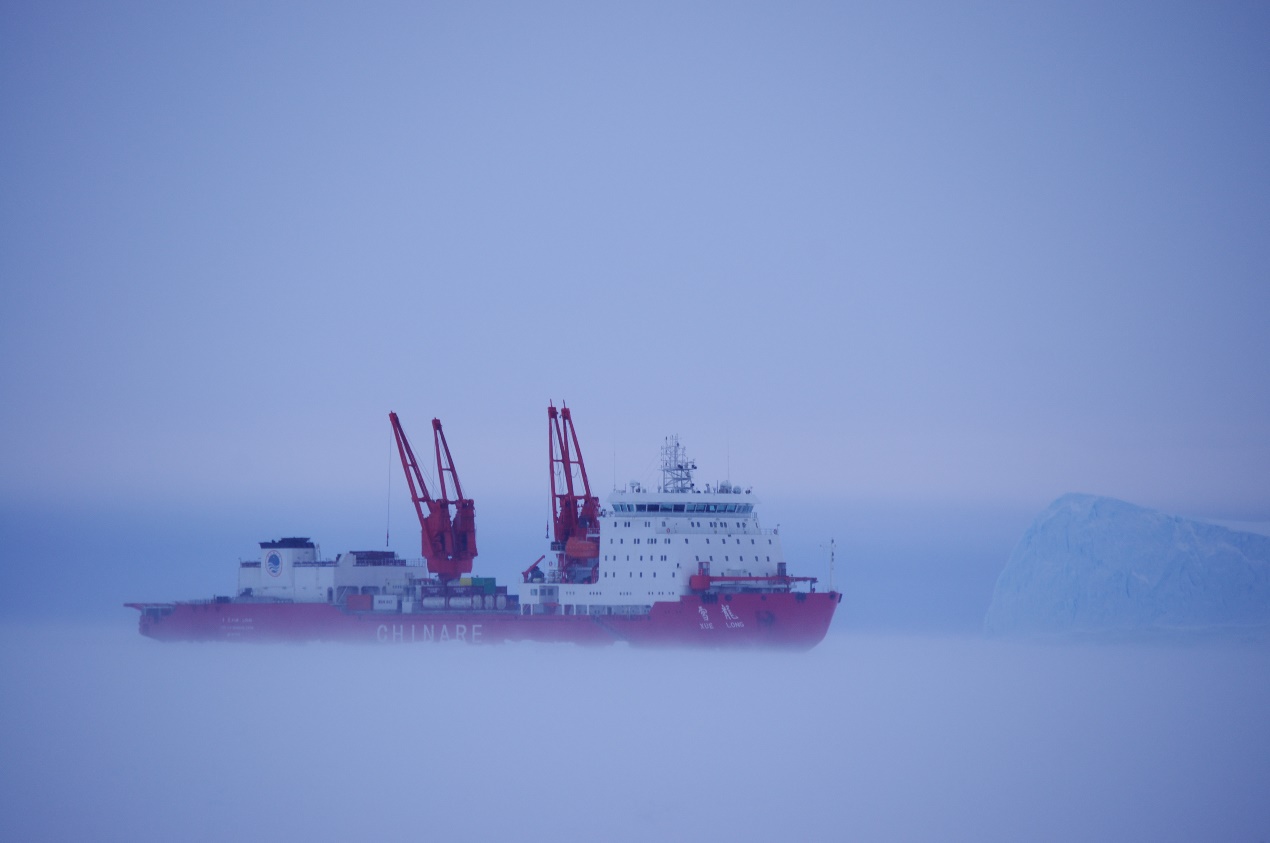


Fig.7 Xuelong research vessel on the ice


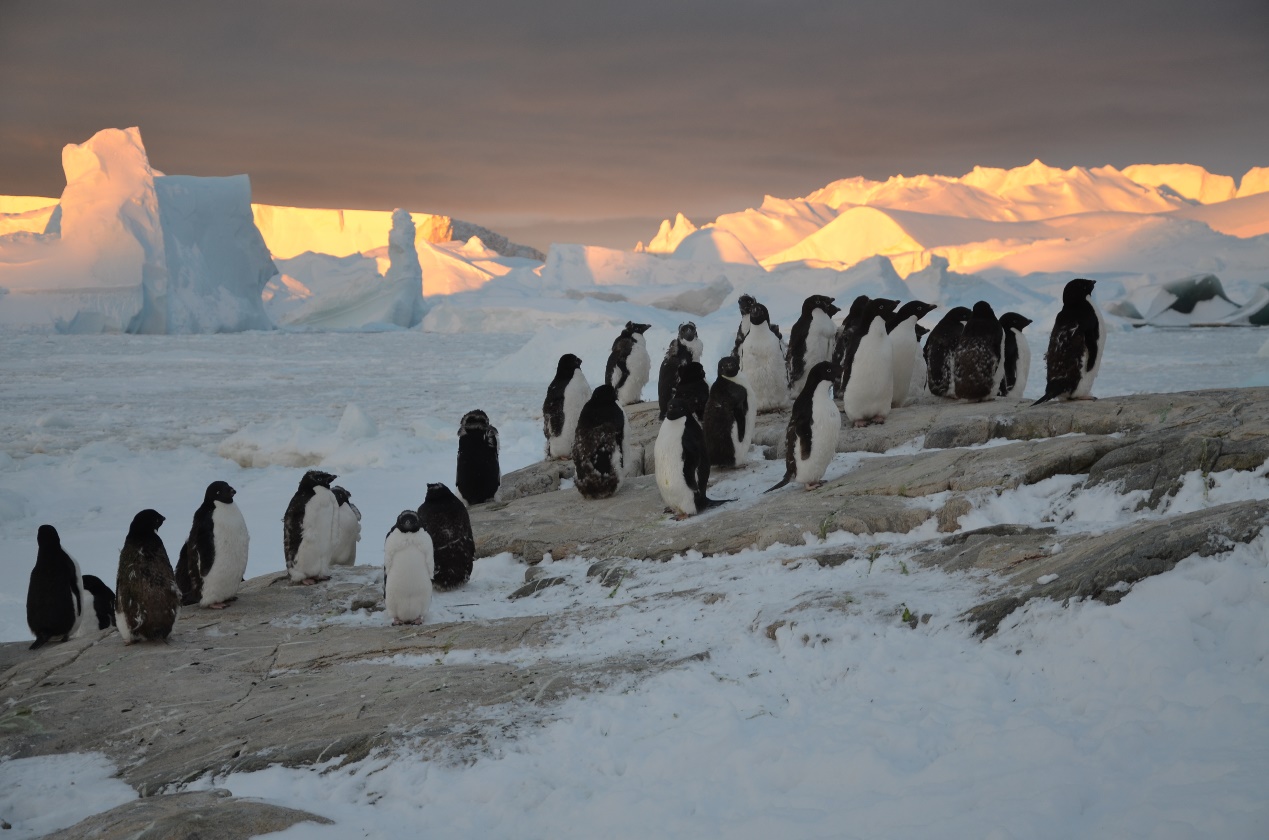


Fig.8 Antarctic penguins through the iceberg


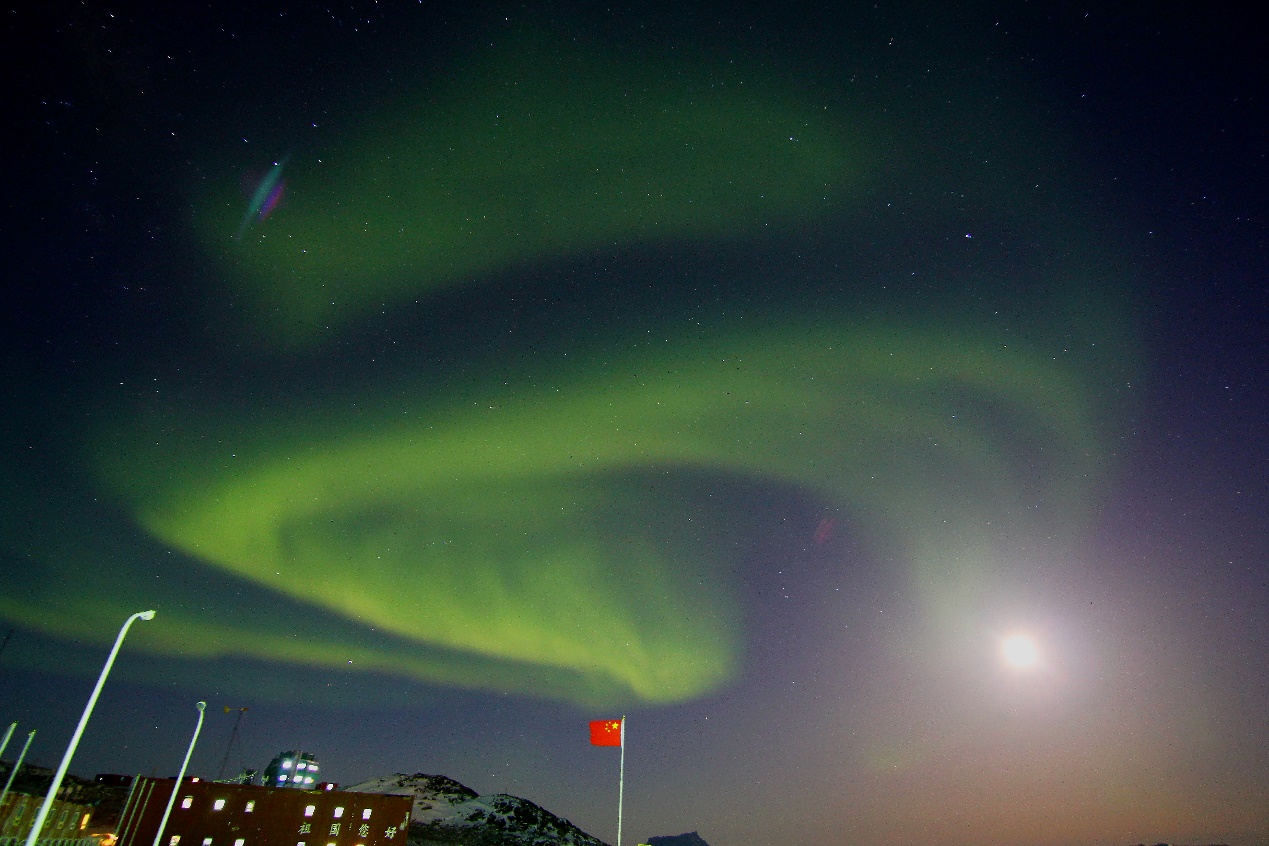


Fig.9 Antarctic aurora at Zhongshan Station


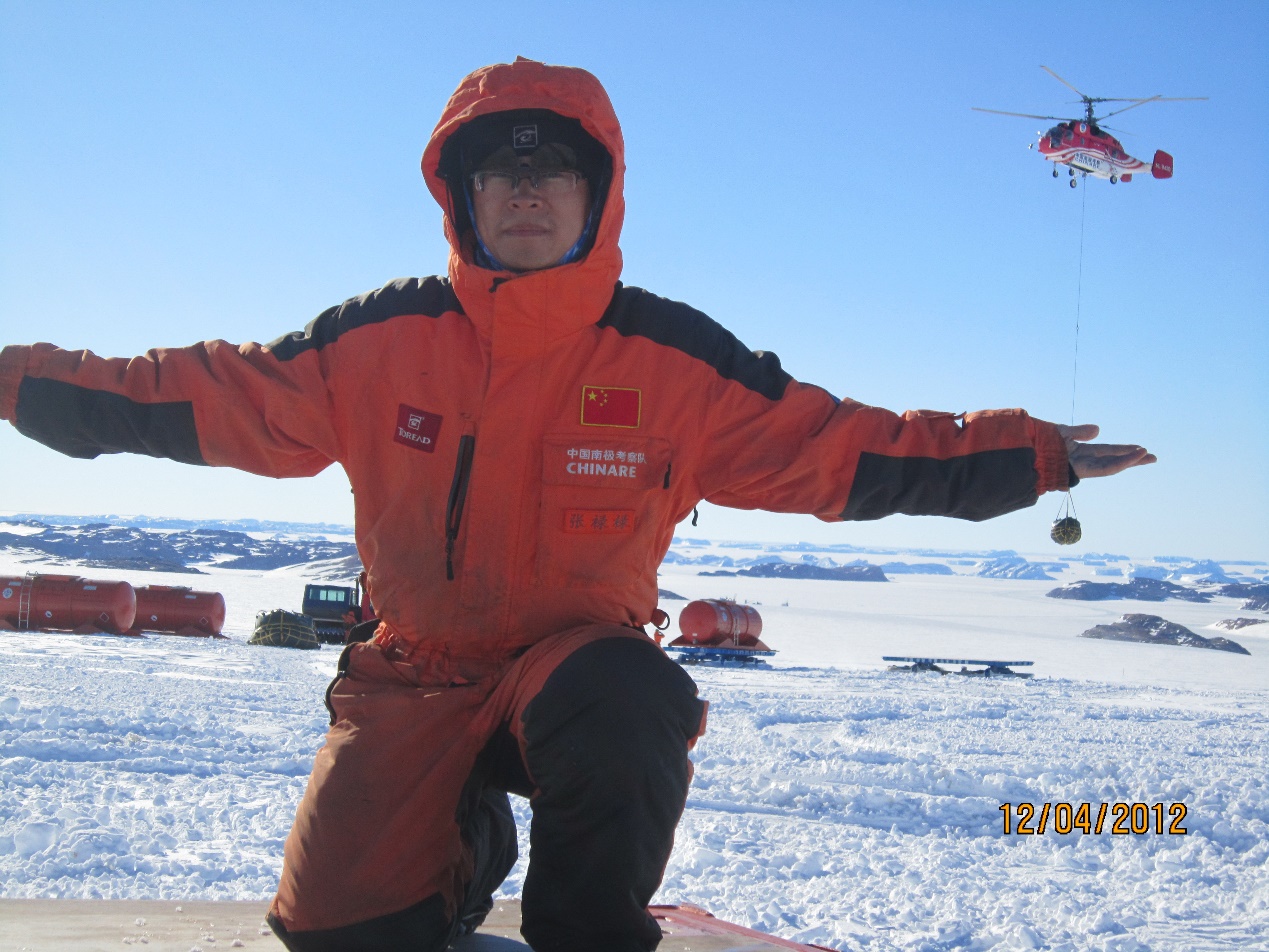


Fig.10 The author (Zhang Lulu) at Antarctic inland set off base (near Zhongshan Station)


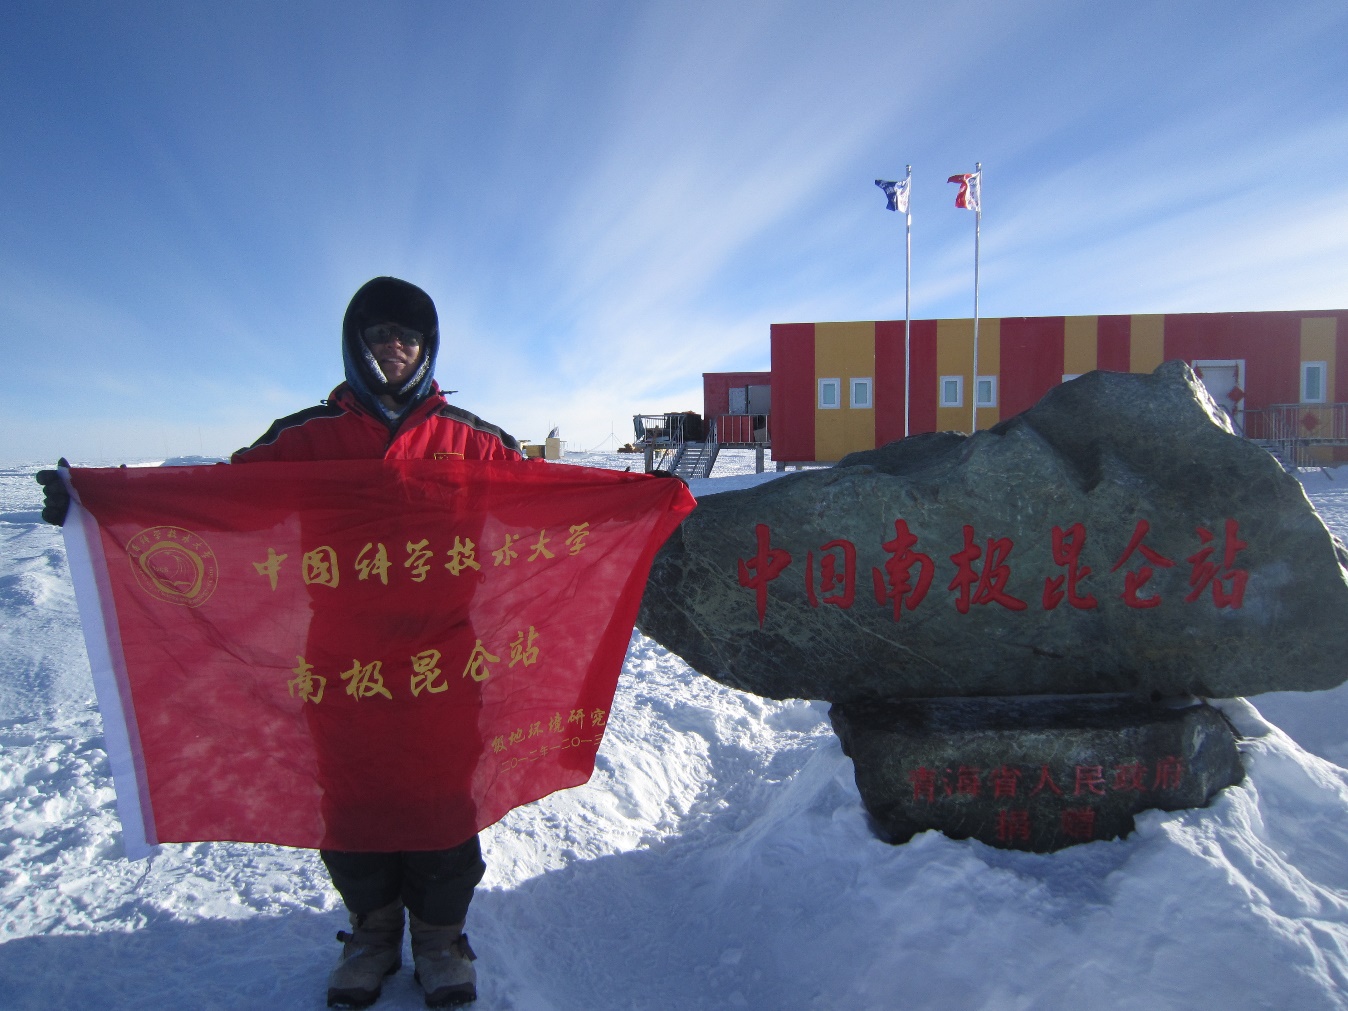


Fig.11 The author (Zhang Lulu) at Antarctic inland Kunlun Station


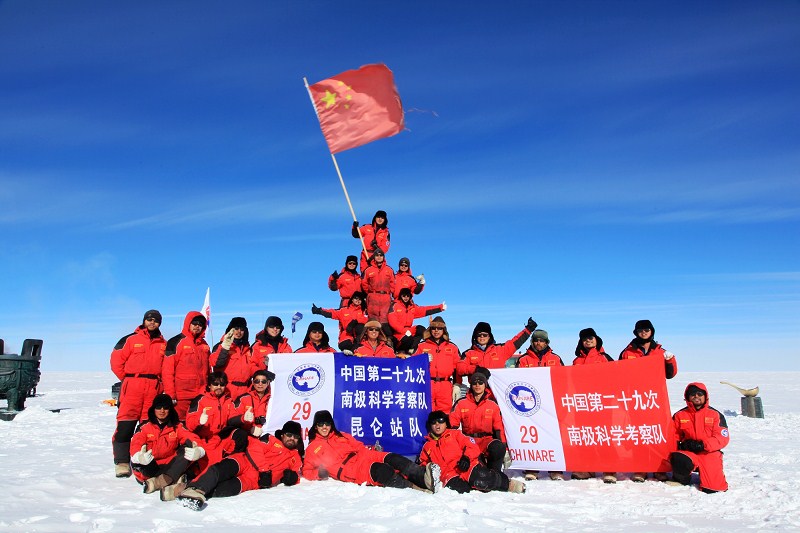


Fig.12 The 29th CHINARE at Dome A near Antarctic inland Kunlun Station
